# Supplementary material
Source: PubMed Central journal article supplement (PMC8133488)
Supplement: mmc1.pdf [file mmc1.pdf]

**Supplemental information**

**Direct derivation of human alveolospheres  
for SARS-CoV-2 infection modeling  
and drug screening**

**Toshiki Ebisudani, Shinya Sugimoto, Kei Haga, Akifumi Mitsuishi, Reiko Takai-Todaka, Masayuki Fujii, Kohta Toshimitsu, Junko Hamamoto, Kai Sugihara, Tomoyuki Hishida, Hisao Asamura, Koichi Fukunaga, Hiroyuki Yasuda, Kazuhiko Katayama, and Toshiro Sato**

A

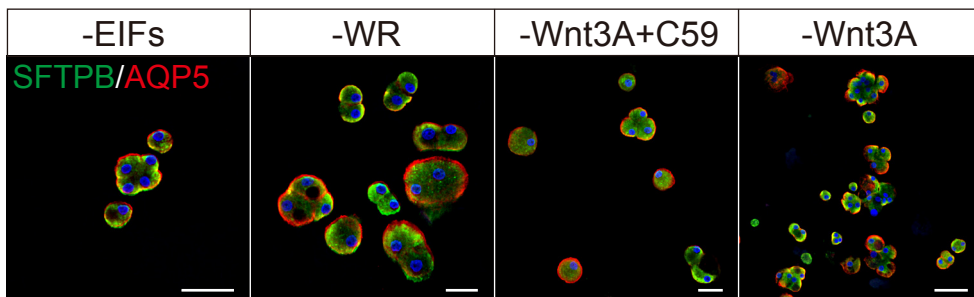

B

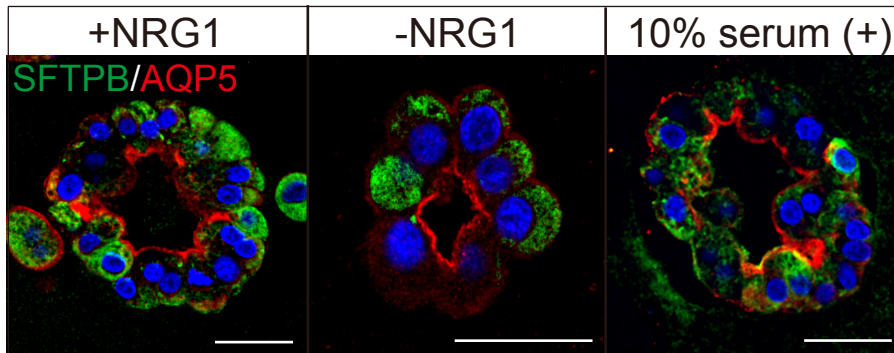

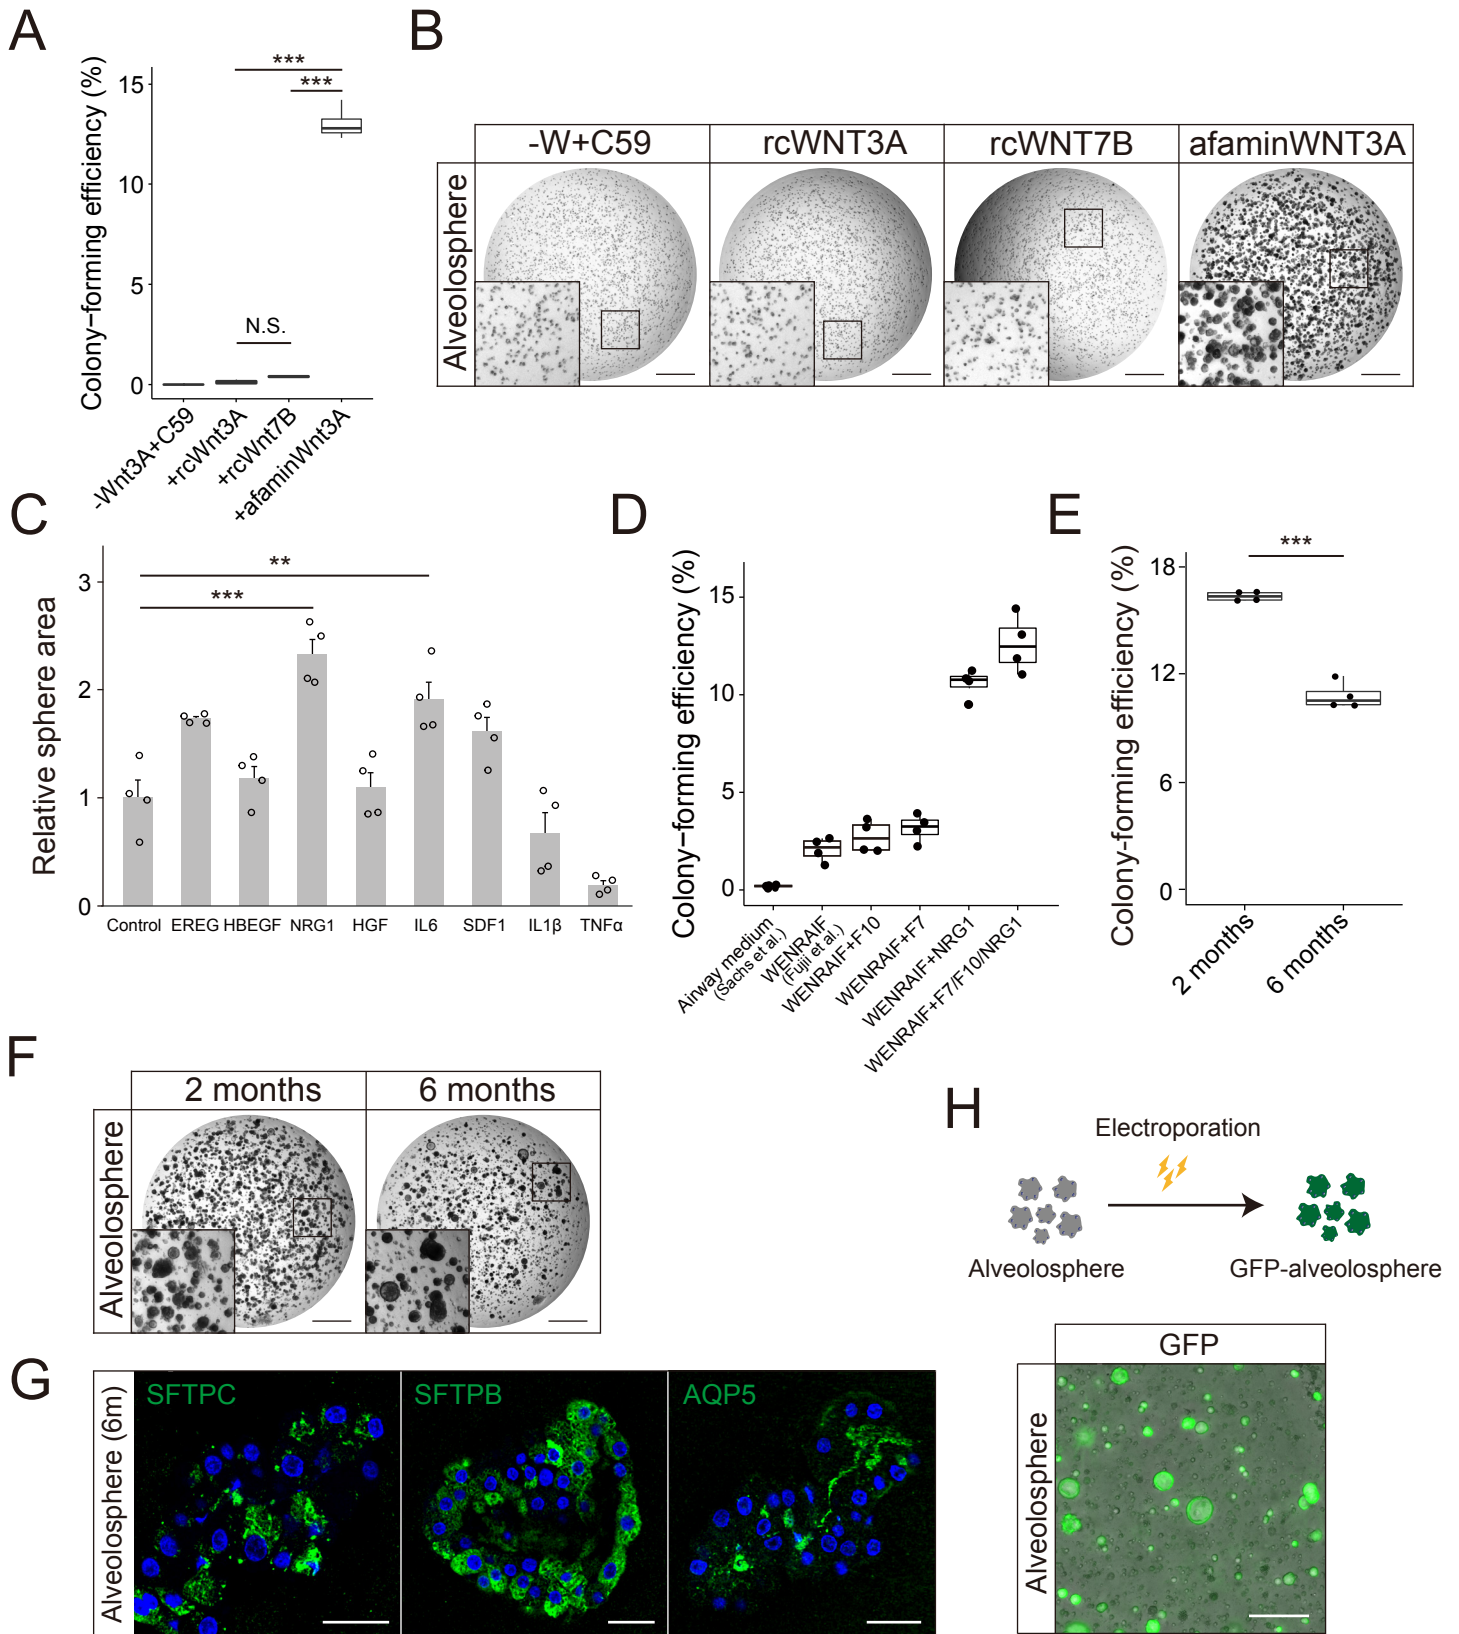

Figure S2

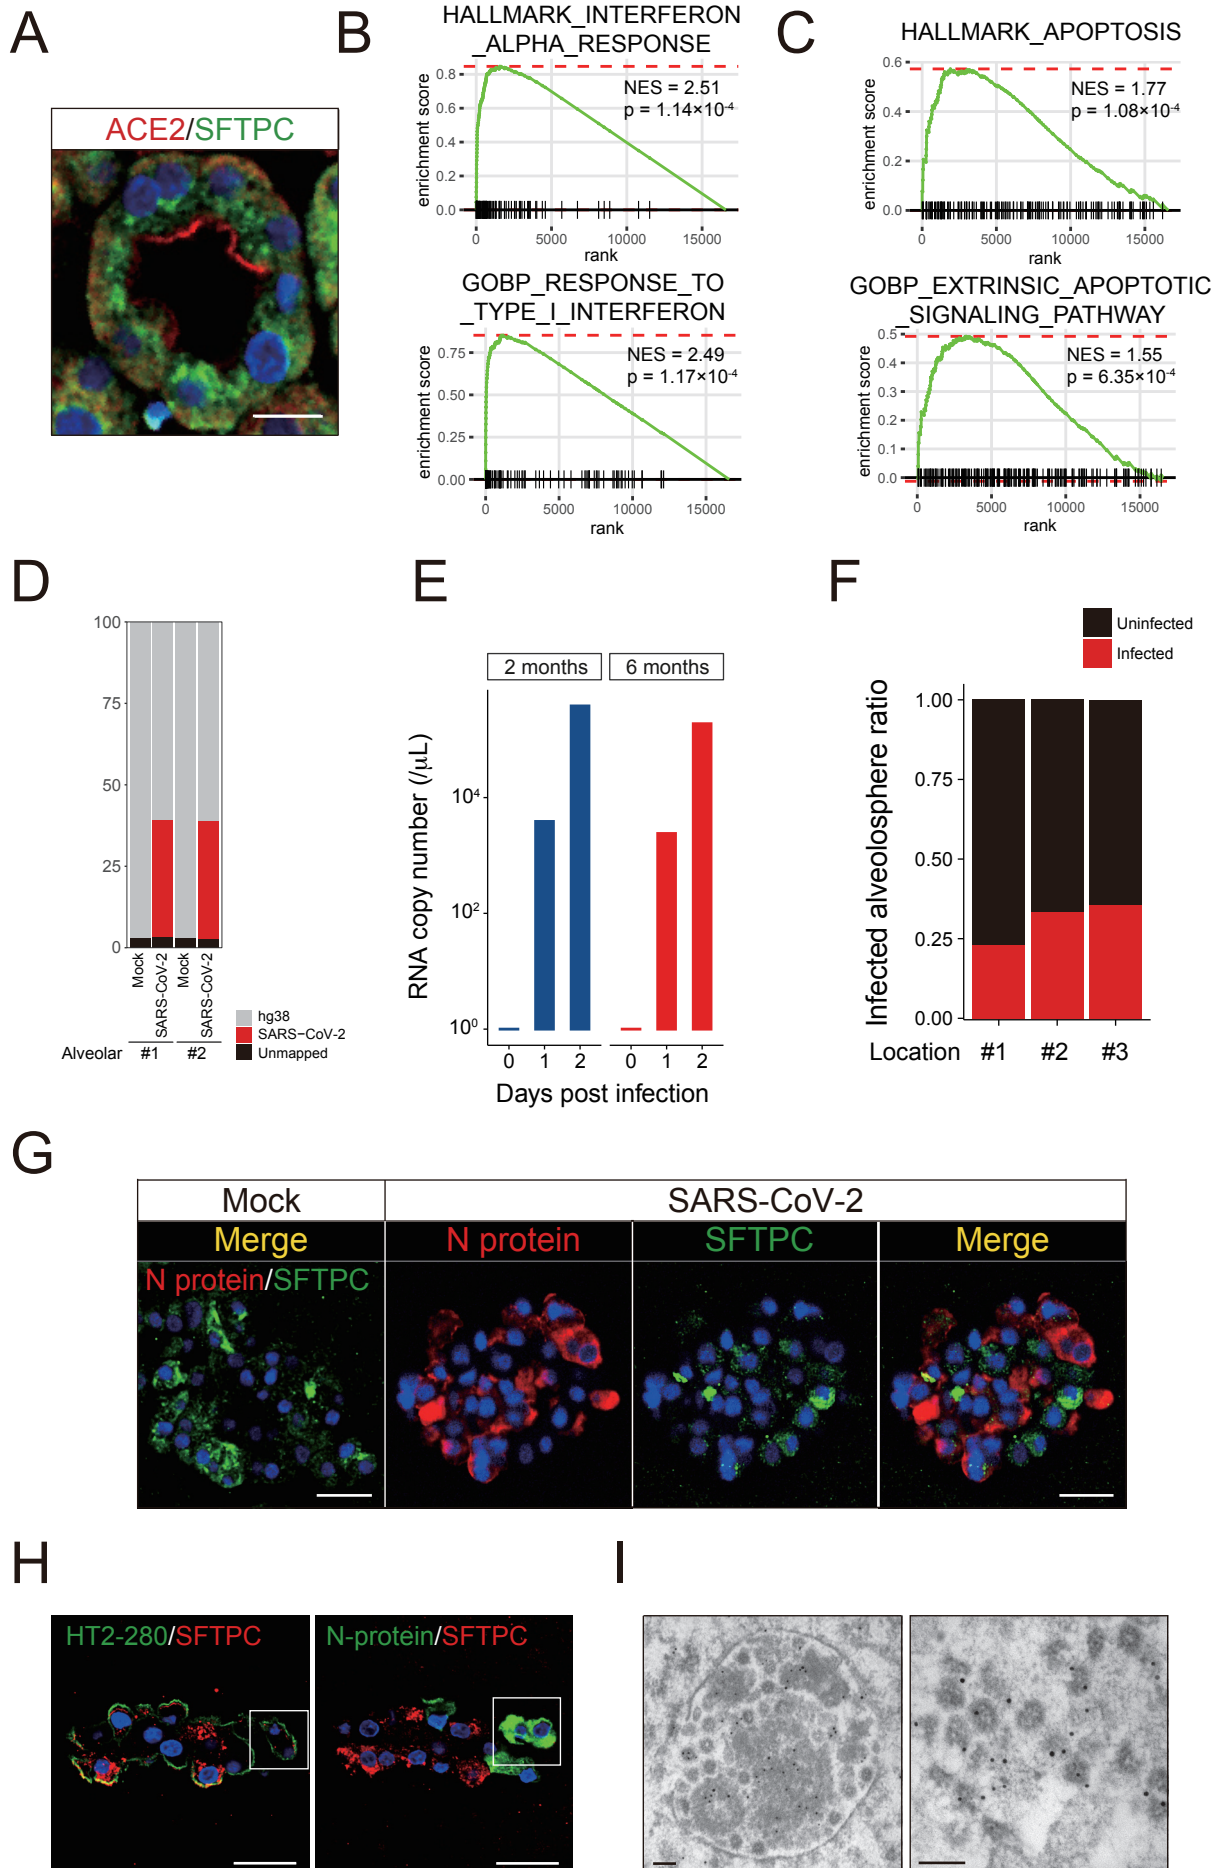

Figure S3

**Figure S1. Immunostaining of Human Alveolospheres, Related to Figure 1.**

(A) Co-staining of SFTPB (green) and AQP5 (red) in alveolospheres cultured with -EIFs, -WR, -Wnt3A+C59 or -Wnt3A. (B) Co-staining of SFTPB (green) and AQP5 (red) in alveolospheres cultured with WENRAIFs and NRG1 (+NRG1, left), WENRAIFs (-NRG1, middle) or WENRAIFs with 10% serum (right). Nuclear counterstaining, Hoechst 33342 (F, G). Scale bar: 2  $\mu$ m (D, right), 10  $\mu$ m (D, left), 25  $\mu$ m (E, right, F, G), and 100  $\mu$ m (E, left).

**Figure S2. Long-term Efficient Expansion of Alveolospheres, Related to Figure 2.**

(A) Colony-forming efficiency of C59-treated alveolospheres (passage 14) in the presence of recombinant Wnt3A (300 ng/mL), recombinant Wnt7B (300 ng/mL) and afamin-Wnt3A or absence of Wnt. Data are demonstrated as mean  $\pm$  SEM. \*\*\*P < 0.001, Welch's unpaired t-test. N.S., not significant. rc, recombinant. (B) Representative bright-field images of alveolospheres expanded from single cells cultured with ENRAIFs + C59 with recombinant Wnt3A, recombinant Wnt7B and afamin-Wnt3A or without Wnt. 5,000 cells were plated per well. (C) The effect of various growth factors and cytokines on the growth of a human alveolosphere line (passage 8). The sphere area was measured on day 21 post plating. Dots show the area of alveolospheres in each well relative to the control. Data are demonstrated as mean  $\pm$  SEM. (D) Colony-forming efficiency of alveolospheres (passage 5) in airway medium (Sachs et al., 2019), intestinal medium (IM) (Fujii et al., 2018), IM with FGF-10 (F10), FGF-7 (F7) or NRG1, and WENARIFs (this study). Data are demonstrated as mean  $\pm$  SEM. (E) Colony-forming efficiency of early- (2 months) and late-passaged (6 months) alveolospheres. Data are demonstrated as mean  $\pm$  SEM. \*\*\*P < 0.001, Welch's unpaired t-test. (F) Representative bright-field images of early- (2 months) and late-passaged (6 months) alveolospheres. (G) Immunostaining of SFTPC (green, left), SFTPB (green, middle) and AQP5 (green, right) in late-passaged (6 months) alveolospheres. (H) Successful GFP-labeling of alveolospheres by electroporation (passage 1, day 11). Nuclear counterstaining, Hoechst 33342 (G). Inset shows higher magnification. Scale bar, 25  $\mu$ m (G), 1 mm (B, F, H). \*\*P < 0.01, \*\*\*P < 0.001, Welch's unpaired t-test.

**Figure S3. Characterization of SARS-CoV-2-infected Human Alveolospheres, Related to Figure 3.**

(A) Co-staining of SFTPC (green) and ACE2 (red) in alveolospheres. (B) Enrichment of two independent interferon-related gene sets in SARS-CoV-2-infected versus mock-infected alveolospheres. NES, normalized enrichment score. (C) Enrichment of two independent apoptosis-related gene sets in SARS-CoV-2-infected versus mock-infected alveolospheres. (D) Percentage of SARS-CoV-2 RNA reads in alveolospheres transcriptomes. Two independent experiments are shown (#1; passage 6, #2; passage 4). (E) Analysis of the SARS-CoV-2 RNA copy number in the culture medium of 2 month or 6 month-old alveolospheres following infection (MOI = 5). Copy numbers are shown as RNA copies per 1  $\mu$ L of the culture medium. (F) Proportion of alveolospheres (passage 7) infected with SARS-CoV-2 at 2 dpi (MOI = 5). (G) Co-staining of SARS-CoV-2 nucleocapsid (N) protein (red) and SFTPC (green) in mock-infected

(left) or SARS-CoV-2-infected (right) alveolospheres (passage 5) (MOI = 5). (H) Co-staining of HT2-280 (green) and SFTPC (red) (left), and N protein (green) and SFTPC (red) (right). (I) Immuno-gold staining of spike protein of SARS-CoV-2 in infected alveolospheres (passage 5) (MOI = 5). Scale bar, 50 nm (I), 10  $\mu\text{m}$  (A), and 25  $\mu\text{m}$  (G, H). Nuclear counterstaining, Hoechst 33342 (A, G, H).

**Table S1. Reagents for Alveolosphere Culture, Related to STAR Methods.**

| <b>Reagent name</b>                                   | <b>Supplier</b>                | <b>Cat No.</b> | <b>Final concentration</b> |
|-------------------------------------------------------|--------------------------------|----------------|----------------------------|
| Matrigel, Growth factor reduced                       | BD Biosciences                 | Cat#356231     | -                          |
| Advanced DMEM/F12                                     | Thermo Fisher Scientific       | Cat#12634010   | -                          |
| HEPES                                                 | Thermo Fisher Scientific       | Cat#15630080   | 100× diluted               |
| GlutaMAX Supplement                                   | Thermo Fisher Scientific       | Cat#35050061   | 100× diluted               |
| Penicillin-Streptomycin                               | Thermo Fisher Scientific       | Cat#15140122   | 100/100 U/mL               |
| B-27 Supplement                                       | Thermo Fisher Scientific       | Cat#17504044   | 50× diluted                |
| N-Acetyl-L-cysteine                                   | Sigma-Aldrich                  | Cat#A9165      | 1 mM                       |
| [Leu <sup>15</sup> ]-Gastrin I human                  | Sigma-Aldrich                  | Cat#G9145      | 10 nM                      |
| Afamin-Wnt-3A serum-free conditioned medium           | Mihara et al., 2016            | N/A            | 25% v/v                    |
| Recombinant mouse EGF                                 | Thermo Fisher Scientific       | Cat#PMG8043    | 50 ng/mL                   |
| Recombinant human IGF-1                               | BioLegend                      | Cat#590904     | 100 ng/mL                  |
| Recombinant human FGF-basic                           | Peprotech                      | Cat#100-18B    | 50 ng/mL                   |
| Recombinant human FGF-10                              | Peprotech                      | Cat#100-26     | 100 ng/mL                  |
| Recombinant human KGF (FGF-7)                         | Peprotech                      | Cat#100-19     | 5 ng/mL                    |
| Recombinant human neuregulin-1 (Heregulin $\beta$ -1) | Peprotech                      | Cat#100-03     | 100 ng/mL                  |
| Recombinant mouse Noggin                              | Peprotech                      | Cat#250-38     | 100 ng/mL                  |
| R-spondin-1 conditioned medium                        | Ootani et al., 2009            | N/A            | 10%                        |
| A83-01                                                | Tocris                         | Cat#2939       | 500 nM                     |
| Y-27632                                               | FUJIFILM Wako Pure<br>Chemical | Cat#253-00513  | 10 $\mu$ M                 |

**Table S2. Patient Characteristics, Related to STAR Methods.**

| <b>Patient</b> | <b>Cell type</b> | <b>Age</b> | <b>Gender</b> | <b>Brinkman<br/>index</b> | <b>Expansion<br/>duration</b> | <b>Background<br/>disease</b>   |
|----------------|------------------|------------|---------------|---------------------------|-------------------------------|---------------------------------|
| 1              | Alveolar         | 75         | M             | 1000                      | >8 months                     | Lung cancer                     |
| 2              | Alveolar         | 54         | F             | 0                         | >8 months                     | Lung cancer                     |
| 3              | Alveolar         | 47         | F             | 0                         | >6 months                     | Lung cancer                     |
| 4              | Alveolar         | 70         | M             | 0                         | >6 months                     | Metastatic<br>colorectal cancer |
| 5              | Alveolar         | 76         | M             | 500                       | >6 months                     | Lung cancer                     |
| 6              | Alveolar         | 74         | F             | 0                         | >6 months                     | Lung cancer                     |
| 7              | Alveolar         | 80         | F             | 0                         | >5 months                     | Lung cancer                     |
| 8              | Alveolar         | 63         | M             | 480                       | >4 months                     | Lung cancer                     |
| 9              | Alveolar         | 69         | M             | 0                         | >4 months                     | Hamartoma                       |
| 10             | Airway           | 75         | M             | 800                       | >8 months                     | Lung cancer                     |
| 11             | Airway           | 85         | M             | 0                         | >6 months                     | Lung cancer                     |

Gender; M: male, F: female
